# Supplementary material
Source: Research Square preprint supplement (doi:10.21203/rs.3.rs-9031942/v1)
Supplement: Supplementary file 1 [file d5333c2522e10aefee0eead6.docx]

**Supplemental Materials**

Page #

Supplemental Figure 1. High school resources of FERBS mentees. 2

Supplemental Figure 2. Prior research-related experiences of FERBS students. 3

Supplemental Figure 3. PennFERBS Administrative Structure. 4

Supplemental Table 1. Developmental progression of FERBS workshops and 5

coursework across four years.

Supplemental Table 2. Supplemental Table 2. Community Partnership Projects (CPP) by cohort

Supplemental Document 1. Survey questions

Class of 2028 8

Class of 2027 28

Class of 2026 51

Class of 2025 and 2024 75

Supplemental Document 2. Interview questions 98

Supplemental Document 3. PennFERBS Biology 1850 Syllabus Spring 2026. 100

**Supplemental Figure 1**. **High school resources of FERBS mentees**.Access to general academic resources varied widely across students’ high schools. Most reported that their schools offered AP or IB courses (53 students; 93%) and honors-level classes (43 students; 75%). Fewer had access to dual-enrollment or college-credit options (33 students; 58%) or extracurricular clubs and competitions (37 students; 65%). However, only 19 students (33%) indicated that their schools had well-equipped science laboratories, and 24 (42%) reported access to a comprehensive college-counseling office. Only 22 students (39%) had access to tutoring services. Overall, these findings suggest that while most participants attended schools offering rigorous coursework, access to broader academic supports and infrastructure varied substantially.
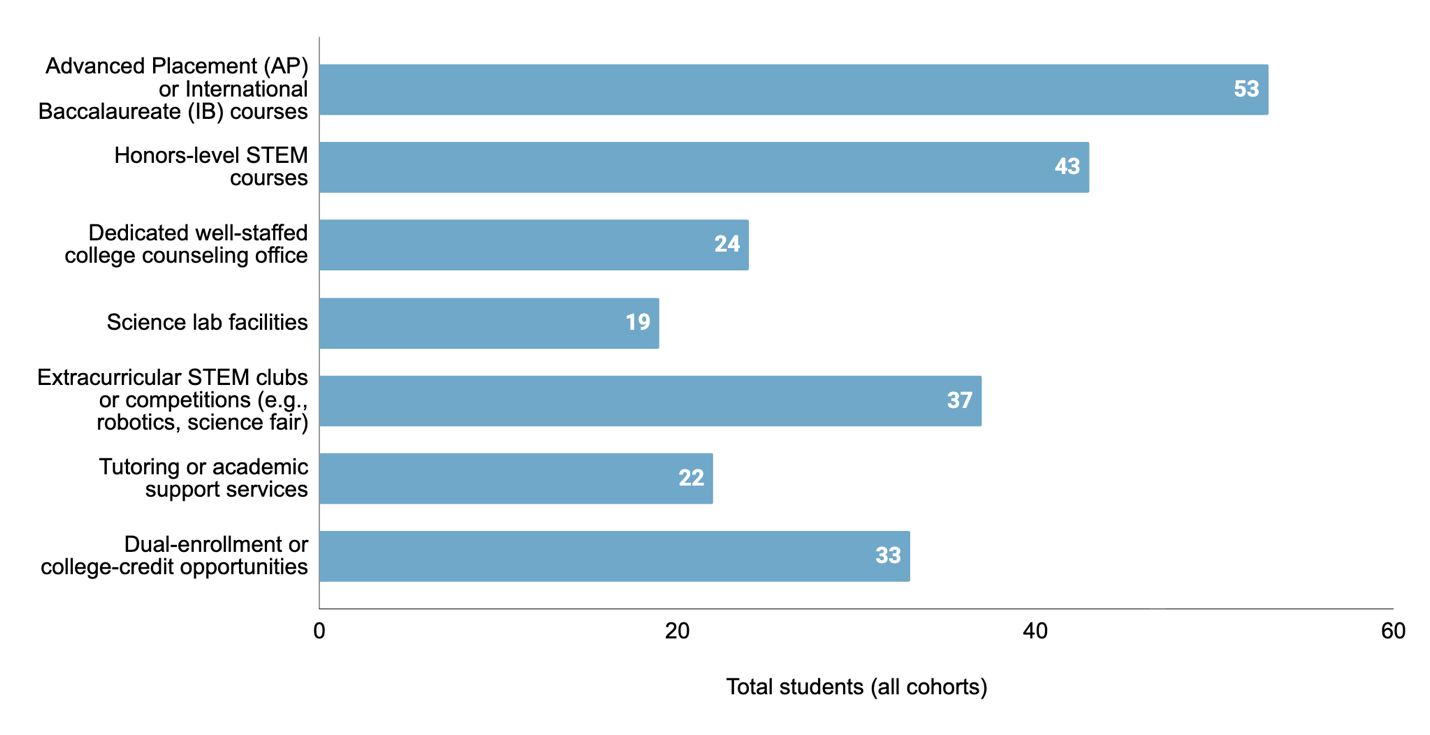


**Supplemental Figure 2.** Prior research-related experiences of FERBS students.


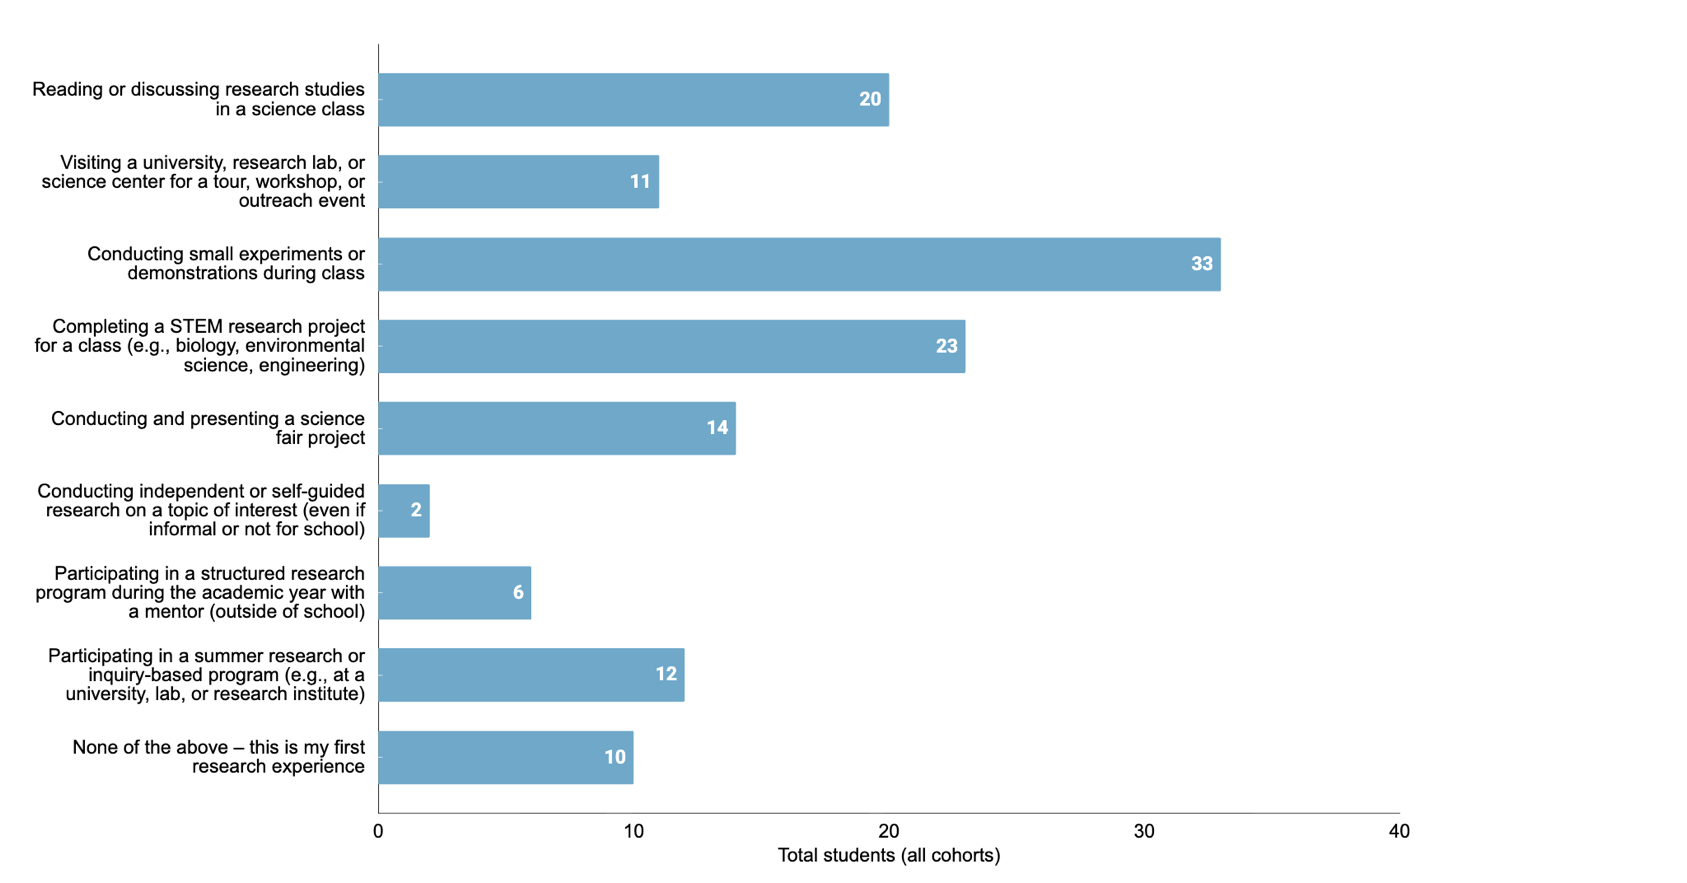


**Supplemental Figure 3. PennFERBS administrative structure**

# **
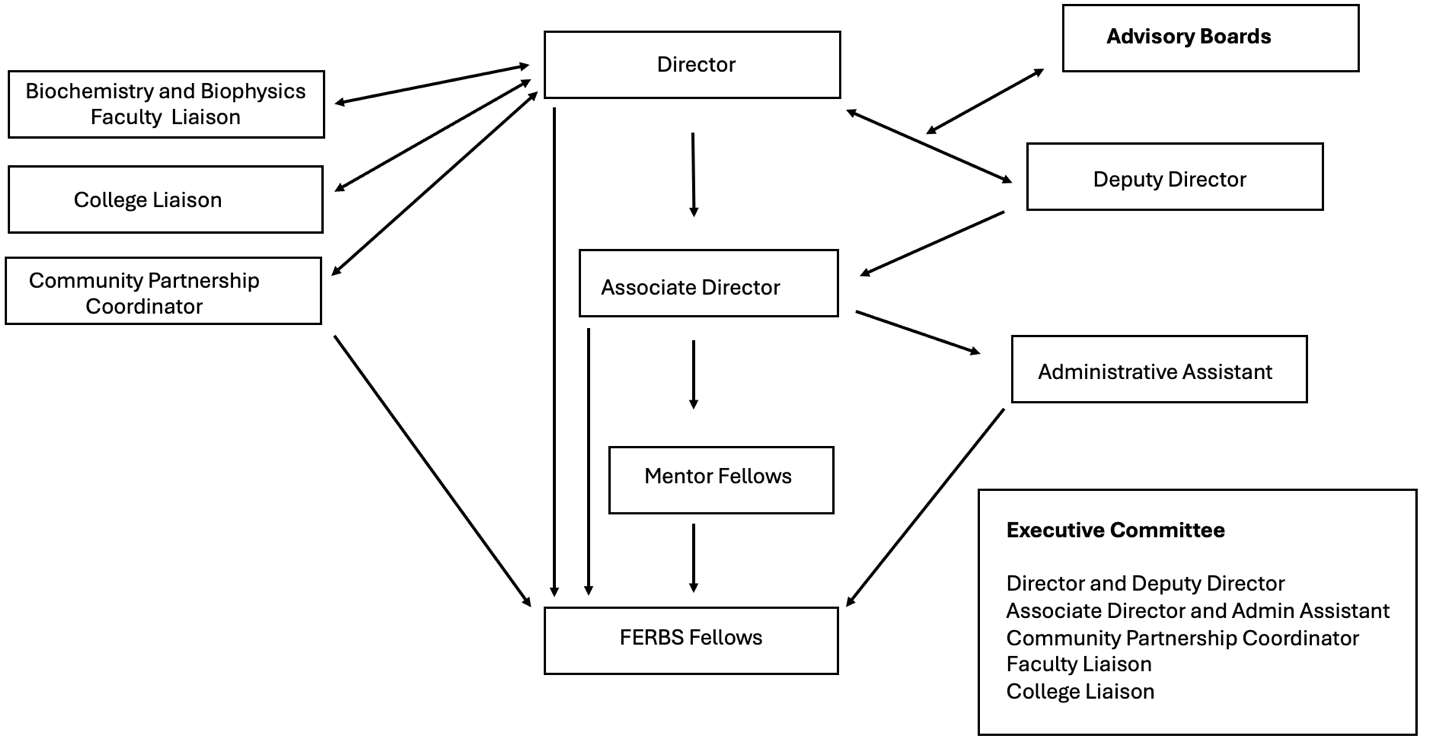
**

**Supplemental Table 1. Community Partnership Projects (CPP) by cohort**. CPPs were introduced with the second FERBS cohort (Class of 2025). In the first year, students were divided into three groups aligned with broad host-lab research areas (neurobiology, cell biology, and plant/microbiology), resulting in three distinct community partnership projects. The Class of 2026 was smaller and organized into two groups with distinct project topics. Beginning with the Class of 2027, cohorts engage in a single overarching community-identified theme, which is addressed from multiple disciplinary perspectives. Students analyze the topic through neurobiology, cell biology, and plant/microbiology lenses and develop age-appropriate, hands-on experiments for K–2, 3-6 or 6-8 classrooms.

| Cohort | Project Focus | Community Partners | Primary Outcomes |
| --- | --- | --- | --- |
| Class of 2025 | Sickle cell anemia awareness | Regional sickle cell association members | Design and launch of a public-facing educational website |
| Class of 2025 | Effects of COVID-19 on middle school students in under-resourced schools | Middle school teachers in underserved communities | Comparative analysis of COVID impacts across school contexts |
| Class of 2025 | Urban tree canopy inequity in West Philadelphia | UC Green employee and community members | Student and family education; introduction of iNaturalist |
| Class of 2026 | Sickle cell anemia education (expanded) | Regional sickle cell association members | Expanded, more accessible website content for diverse audiences |
| Class of 2026 | Trauma and neurological consequences in trafficked women | Physical therapy faculty; refuge director for trafficked women | Community-informed understanding of trauma impacts and support needs |
| Class of 2027 | Urban ecology and environmental justice | Jubilee School teachers; campus and external experts | Community-engaged experiments exploring urban ecology and environmental justice |
| Class of 2028 | Water equity and urban climate justice | Jubilee School teachers; campus and external experts | Community-engaged experiments linking biology, water access, and climate |
| Class of 2029 | Chemical herbicide use in Philadelphia public parks | Belmont Charter School teacher (6-8th graders); City Council; Pennsylvania Horticultural Society representatives | Community-engaged experiments evaluating herbicide use and potential mitigation strategies |

**Supplemental Table 2. Developmental progression of FERBS workshops and coursework across four years.** This table summarizes the sequence and focus of workshops and coursework that collectively support fellows’ development in research skills, scientific communication, leadership, wellbeing, and community-engaged scientific thinking. Workshops are organized developmentally by year, with foundational competencies introduced in the first year, reinforced through increasing responsibility and independence in subsequent years, and consolidated during senior-year professional preparation. While workshops are listed by primary year of emphasis, several sessions are intentionally open to multiple cohorts, fostering vertical integration, near-peer learning, and reinforcement of shared competencies across program years. The first-year spring course (BIOL 1850) incorporates a structured Community Partnership Project; detailed course content and learning objectives are provided in the syllabus (Supplemental Document 1).

| **Workshop / Course** | **Description** |
| --- | --- |
| Introduction to Research and Lab Structure (Year 1 – Fall) | Introduces students to the structure and culture of academic research laboratories, including roles, expectations, communication norms, and strategies for navigating uncertainty and learning in research environments. |
| How to Read a Scientific Paper  (Year 1 – Fall) | Guides students through the structure and interpretation of scientific papers, reinforced through journal club discussions that emphasize critical reading and scientific reasoning. |
| Science Communication  (Year 1 – Fall) | Introduces storytelling as a core scientific skill, highlighting how narrative, audience awareness, and clarity strengthen scientific communication. |
| Responsible Conduct in Research  (Year 1 – Fall) | Covers ethical research practices including data management, analysis, interpretation, authorship, and research integrity. |
| How to Give an Oral Presentation  (Year 1 – Fall) | Prepares students to deliver a concise oral presentation on their research, emphasizing clarity, structure, and confidence. |
| Mental Health and Wellness  in STEM (Year 1 – Fall) | Addresses wellbeing in research environments, including stress management, self-value, boundary-setting, resilience, and normalizing help-seeking. |
| BIOL 1850: Biological  Sciences and Its Social  Implications (Year 1 – Spring) | Credit-bearing course integrating ongoing laboratory research with structured community partnership projects, scientific communication, ethical reflection, and policy-relevant inquiry. See Supplemental Document 3 for full syllabus. |
| Leadership Development  (Year 2) | Focuses on time management, prioritization, self-value, self-advocacy, and boundary-setting to support sustainable leadership. |
| Applying to Summer Internships (Year 2) | Provides guidance on identifying and applying to summer research opportunities including REUs, industry, and clinical research programs. |
| Studying Abroad (Year 2) | Introduces study abroad and international research opportunities, including academic planning, funding, and alignment with STEM career goals. |
| Handling Failure and Uncertainty  (Year 2) | Faculty and postdoctoral fellows share personal experiences with failure to normalize uncertainty and persistence in science. |
| How to Write an Abstract  (Year 2) | Prepares students to write and submit abstracts for the Annual FERBS Research Symposium. |
| Preparing for Independent Study (Year 2) | Explains requirements for enrolling in independent study across STEM majors and aligning coursework with research. |
| How to Be a Peer Mentor  (Year 3) | Develops relational mentoring skills including active listening, trust-building, boundary-setting, and responsible referral. |
| Scientific Creativity  (Year 3) | Explores creativity in scientific thinking, problem formulation, and experimental design. |
| The Science of Scientific Writing (Year 3) | Breaks down the structure and components of research papers and honors theses, including citation practices. |
| Navigating Writer’s Block  (Year 4) | Provides strategies for overcoming writing barriers in research papers and personal statements. |
| Personal Statement Workshop  (Year 4) | Supports development of personal statements through elevator pitches, peer feedback, and guided writing. |
| How to Present an Honors Thesis (Year 4) | Prepares students for formal research presentations and symposium talks. |
| One-Slide Meeting (Year 4) | Students present a single slide summarizing research progress or annual goals to foster concise communication. |
| Alumni panels (Year 1-4) | Panels of FERBS alumni sharing reflections on their experiences in the program, transitions beyond FERBS, and insights into graduate school, professional training, and career trajectories. |
| Career development (Year 1-4) | Individual speakers and panels featuring professionals from a diverse range of STEM careers, highlighting career pathways, decision-making, and the skills needed for success across sectors. |

Supplemental Document 1. Surveys Class of 2028 - Class of 2024

Survey (Class of 2028)

Survey Flow

Block: Background prior to joining FERBS (4 Questions)

Standard: Academic Experience with STEM (6 Questions)

Standard: Research Experience (6 Questions)

Standard: Community Partnership & Growth (8 Questions)

Standard: Skill Development (6 Questions)

Standard: Mentors (2 Questions)

Standard: Wellness (9 Questions)

Standard: Reflection and Feedback (5 Questions)

Start of Block: Background prior to joining FERBS

Q39 **Background prior to joining FERBS**

Q1  What type of high school did you attend?

- Public (1)
- Charter (2)
- Private (with full scholarship) (3)
- Private (full or partial pay) (4)
- Homeschool (5)
- Other: (6) __________________________________________________

Q2 Which of the following were available at your high school? (Check all that apply)

- Advanced Placement (AP) or International Baccalaureate (IB) courses (1)
- Honors-level STEM courses (2)
- Dedicated well-staffed college counseling office (3)
- Science lab facilities (4)
- Extracurricular STEM clubs or competitions (e.g., robotics, science fair) (5)
- Tutoring or academic support services (6)
- Dual-enrollment or college-credit opportunities (7)
- None of the above (8)

Q3 Before joining this program, which of the following best describes your experience with research? (Check all that apply)

- Reading or discussing research studies in a science class (1)
- Visiting a university, research lab, or science center for a tour, workshop, or outreach event (2)
- Conducting small experiments or demonstrations during class (3)
- Completing a STEM research project for a class (e.g., biology, environmental science, engineering) (4)
- Conducting and presenting a science fair project (5)
- Participating in a structured research program during the academic year with a mentor (outside of school) (6)
- Participating in a summer research or inquiry-based program (e.g., at a university, lab, or research institute) (7)
- Conducting independent or self-guided research on a topic of interest (even if informal or not for school) (8)
- None of the above – this is my first research experience (9)
- Other (please specify): (10) __________________________________________________

End of Block: Background prior to joining FERBS

Start of Block: Academic Experience with STEM

Q41 **Academic Experience with STEM**

Q4 Are you pre-med/vet/dental?

- No (1)
- Yes (2)

Q5 List any STEM classes you took in Spring (besides BIOL 1850), and rate each one as "E" for Easy, "M" for Moderately Challenging, or "D" for Difficult. If you didn’t take any additional STEM classes, write N/A.

________________________________________________________________

________________________________________________________________

________________________________________________________________

________________________________________________________________

________________________________________________________________

Q6 Did you access any academic support services for your STEM courses?

- No (1)
- Yes → Please specify what support you accessed and whether it was helpful (2) __________________________________________________

Q7 How do you think the FERBS program (peers, mentors, workshops, research etc.) helped you navigate your STEM classes this year?

________________________________________________________________

________________________________________________________________

________________________________________________________________

________________________________________________________________

________________________________________________________________

Q8 Did you drop any STEM classes this Spring semester?

- No (1)
- Yes, please briefly explain why (2) __________________________________________________

End of Block: Academic Experience with STEM

Start of Block: Research Experience

Q40 **Research Experience**

Q9 How comfortable do you currently feel with designing and conducting research?

- Extremely uncomfortable (1)
- Somewhat uncomfortable (2)
- Neither comfortable nor uncomfortable (3)
- Somewhat comfortable (4)
- Extremely comfortable (5)

Q10 How interested or enthusiastic are you about research now?

- Not interested (1)
- Slightly interested (2)
- Moderately interested (3)
- Very interested (4)
- Extremely interested (5)

Q11 How comfortable do you currently feel

|  | Extremely uncomfortable (12) | Somewhat uncomfortable (13) | Neutral (14) | Somewhat comfortable (15) | Extremely comfortable (16) |
| --- | --- | --- | --- | --- | --- |
| Communicating scientific ideas to technical audiences (1) |  |  |  |  |  |
| Communicating scientific ideas to non-technical experts (2) |  |  |  |  |  |

Q12 Please indicate how your experience in FERBS has changed the following areas for you, compared to when you first joined.

|  | Significantly decreased (1) | Slightly decreased (2) | No change (3) | Slightly increased (4) | Significantly increased (5) |
| --- | --- | --- | --- | --- | --- |
| Your comfort with designing and conducting research (1) |  |  |  |  |  |
| Your interest and enthusiasm for research (2) |  |  |  |  |  |
| Your comfort communicating scientific ideas to scientific/technical audiences (3) |  |  |  |  |  |
| Your comfort communicating scientific ideas to non-scientific audiences (4) |  |  |  |  |  |

Q13 What specific experiences contributed towards your research and communication skills?

________________________________________________________________

________________________________________________________________

________________________________________________________________

________________________________________________________________

________________________________________________________________

End of Block: Research Experience

Start of Block: Community Partnership & Growth

Q42 **Community Partnership & Growth**

Q14 To what extent do you now see scientific research as a tool for addressing real-world or community-based problems?

- Not at all (1)
- A little (2)
- Somewhat (3)
- Quite a bit (4)
- Very much so (5)

Q16 Has your community project helped you identify any gaps between scientific research and the needs of the community? If so, in what ways?

________________________________________________________________

________________________________________________________________

________________________________________________________________

________________________________________________________________

________________________________________________________________

Q17 Which of the following communication skills have you practiced or strengthened through your community-engaged work? (Check all that apply)

- Explaining research clearly to non-scientists (1)
- Listening to diverse perspectives (2)
- Adapting scientific language for different audiences (3)
- Using examples or analogies to communicate concepts (4)
- Communicating across cultures or backgrounds (5)

Q18 How did collaborating with community partners differ from working with lab mentors or peers? What did you learn from this?

________________________________________________________________

________________________________________________________________

________________________________________________________________

________________________________________________________________

________________________________________________________________

Q19 Did your experience with the community project influence your academic or research interests?

- Yes, it helped clarify my goals (1)
- Yes, it changed or expanded my interests (2)
- No, but it reinforced my existing interests (3)
- No, it did not influence my goals (4)
- I’m not sure (5)

Q20 Was there a moment during the project that challenged your assumptions or shifted your perspective? What did you learn from it?

________________________________________________________________

________________________________________________________________

________________________________________________________________

________________________________________________________________

________________________________________________________________

Q21 What would you say to another student about the value of community partnership in STEM education?

________________________________________________________________

________________________________________________________________

________________________________________________________________

________________________________________________________________

________________________________________________________________

End of Block: Community Partnership & Growth

Start of Block: Skill Development

Q43 **Skill Development**

Q22 Which of the following skills did you develop or strengthen during your FERBS research experience? (Check all that apply)

Q23 Core Research & Technical Skills

- Designing experiments or research protocols (1)
- Conducting lab techniques (e.g., PCR, microscopy, cloning) (2)
- Using data analysis tools (e.g., R, Python, MATLAB, Excel) (3)
- Analyzing genomic/proteomic or other large-scale datasets (4)
- Literature review and hypothesis development (5)
- Keeping a lab or research notebook (6)
- Troubleshooting experiments or code (7)
- Managing research data (organizing, documenting, backing up) (8)

Q24 Scientific Communication Skills

- Preparing scientific figures or posters (1)
- Writing up research findings (e.g., abstracts, papers) (2)
- Presenting research orally to a scientific audience (3)
- Explaining scientific concepts to non-scientists (4)
- Adapting communication style based on audience (5)

Q25 Interpersonal & Leadership Skills

- Collaborating effectively with others in a research setting (1)
- Mentoring or guiding other students in lab or FERBS (2)
- Leading or co-leading a research-related task or project (3)
- Navigating challenges or setbacks in research (4)

Q26 Societal Relevance & Reflection

- Connecting your research to community or societal issues (1)
- Reflecting on the purpose and impact of your research (2)
- Thinking critically about equity and representation in science (3)

End of Block: Skill Development

Start of Block: Mentors

Q44 **Mentors**

Q27 Please rate your level of academic and social support from the following

|  | No support (1) | Minimal support (2) | Moderate support (3) | Strong support (4) | Very strong support (5) |
| --- | --- | --- | --- | --- | --- |
| FERBS Cohort (1) |  |  |  |  |  |
| FERBS Peer Mentors (2) |  |  |  |  |  |
| FERBS Lab Mentors (3) |  |  |  |  |  |
| FERBS leadership team (4) |  |  |  |  |  |
| Penn STEM Faculty (5) |  |  |  |  |  |
| Penn Non-STEM Faculty (6) |  |  |  |  |  |
| Academic Advisor (7) |  |  |  |  |  |

End of Block: Mentors

Start of Block: Wellness

Q45 **Wellness**

Q28 During your time at Penn, have there been moments when you needed emotional or mental health support?

- No (1)
- Yes (2)

Display this question:

If During your time at Penn, have there been moments when you needed emotional or mental health supp... = Yes

Q30 Did you seek support during those times?

- Yes, I accessed support services (1)
- No, I did not seek support (2)
- I considered it, but wasn’t able to access support (3)

Display this question:

If Did you seek support during those times? = Yes, I accessed support services

Q29 If you accessed support, can you please rate the resources you accessed at Penn or outside the university?

|  | Not helpful (7) | Slightly helpful (8) | Moderately helpful (9) | Very helpful (10) | Extremely helpful (11) | Not Applicable (12) |
| --- | --- | --- | --- | --- | --- | --- |
| CAPS (Counseling and Psychological Services) (1) |  |  |  |  |  |  |
| Peer support networks (FERBS cohort, friends) (2) |  |  |  |  |  |  |
| FERBS team (3) |  |  |  |  |  |  |
| Academic advisors or mentors (4) |  |  |  |  |  |  |
| Religious/spiritual support (5) |  |  |  |  |  |  |

Display this question:

If Did you seek support during those times? = Yes, I accessed support services

Q31 Please mention any other resources you have accessed if not included above

________________________________________________________________

________________________________________________________________

________________________________________________________________

________________________________________________________________

________________________________________________________________

Q32 What aspects of FERBS have contributed most to your sense of safety, support, or sense of belonging?

________________________________________________________________

________________________________________________________________

________________________________________________________________

________________________________________________________________

________________________________________________________________

Q33 How well have you been able to manage academic stress this year?

- Not well at all (1)
- Slightly well (2)
- Somewhat well (3)
- Quite well (4)
- Extremely well (5)

Q34 What strategies or FERBS-related activities have helped you manage stress or stay grounded during difficult times?

________________________________________________________________

________________________________________________________________

________________________________________________________________

________________________________________________________________

________________________________________________________________

Q35 Do you feel that FERBS fosters a culture of care and well-being among its fellows? Why or why not?

________________________________________________________________

________________________________________________________________

________________________________________________________________

________________________________________________________________

________________________________________________________________

End of Block: Wellness

Start of Block: Reflection and Feedback

Q46 **Reflection and Feedback**

Q47 Please rate the impact of each FERBS component on your development as a researcher

|  | No impact (1) | Slight impact (2) | Moderate impact (3) | Significant impact (4) | Very significant impact (5) |
| --- | --- | --- | --- | --- | --- |
| Working in research labs (1) |  |  |  |  |  |
| Mentorship from researchers (4) |  |  |  |  |  |
| Peer relationships (5) |  |  |  |  |  |
| Workshops (6) |  |  |  |  |  |
| Visiting panels of speakers (7) |  |  |  |  |  |
| Industry talks (8) |  |  |  |  |  |
| Career services (9) |  |  |  |  |  |
| Community Partnership Project (10) |  |  |  |  |  |

Q36 Please check all the FERBS activities that had a meaningful impact on your sense of belonging in STEM, interest in research, career goals, or overall skill development.

- How to Read a Scientific Paper (90)
- Data Analysis and Responsible Conduct of Research (91)
- Visit with Dr. Ala Stanford (92)
- Seeing Yourself in Science Panel with FERBS alumni (93)
- Elevator Pitch / Reflection on Peer Lab Visits (94)
- Science Communication with Alexis Pedrick (95)
- Peer Lab Visit Assignments (96)
- Majoring in Biology and the Biological Sciences (Meet the Undergraduate Chairs) (97)
- Literature Searches & Professionalism in Science (98)
- Community Partnership Project Introduction & Partner Interaction (99)
- How to Create a Research Poster (100)
- How to Present a Research Poster (101)
- How to Give a Clear Oral Research Presentation (102)
- Intro to Pharma/Biotech Internships with Merck (103)
- Networking Workshop with Merck Scientists at Symposium (104)
- Mental Health Wellness with Mike (105)
- Research Paper Discussions (journal club) (106)
- How to Brand Yourself in STEM with Camille Smith (107)

Q37 If you’d like, please share which of the activities you checked above were especially meaningful and why.

________________________________________________________________

________________________________________________________________

________________________________________________________________

________________________________________________________________

________________________________________________________________

Q38 Do you have any other reflections, feedback, or suggestions about your experience with the FERBS program or its activities this year?

________________________________________________________________

________________________________________________________________

________________________________________________________________

________________________________________________________________

________________________________________________________________

End of Block: Reflection and Feedback

Survey (Class of 2027)

Survey Flow

Block: Background prior to joining FERBS (4 Questions)

Standard: Academic Experience with STEM (6 Questions)

Standard: Research Experience (6 Questions)

Standard: Community Partnership & Growth (8 Questions)

Standard: Skill Development (6 Questions)

Standard: Mentors (2 Questions)

Standard: Learning Experience Reflection (3 Questions)

Standard: Wellness (9 Questions)

Standard: Reflection and Feedback (5 Questions)

| Page Break |  |
| --- | --- |

Start of Block: Background prior to joining FERBS

Q39 **Background prior to joining FERBS**

Q1  What type of high school did you attend?

- Public (1)
- Charter (2)
- Private (with full scholarship) (3)
- Private (full or partial pay) (4)
- Homeschool (5)
- Other: (6) __________________________________________________

Q2 Which of the following were available at your high school? (Check all that apply)

- Advanced Placement (AP) or International Baccalaureate (IB) courses (1)
- Honors-level STEM courses (2)
- Dedicated well-staffed college counseling office (3)
- Science lab facilities (4)
- Extracurricular STEM clubs or competitions (e.g., robotics, science fair) (5)
- Tutoring or academic support services (6)
- Dual-enrollment or college-credit opportunities (7)
- None of the above (8)

Q3 Before joining this program, which of the following best describes your experience with research? (Check all that apply)

- Reading or discussing research studies in a science class (1)
- Visiting a university, research lab, or science center for a tour, workshop, or outreach event (2)
- Conducting small experiments or demonstrations during class (3)
- Completing a STEM research project for a class (e.g., biology, environmental science, engineering) (4)
- Conducting and presenting a science fair project (5)
- Participating in a structured research program during the academic year with a mentor (outside of school) (6)
- Participating in a summer research or inquiry-based program (e.g., at a university, lab, or research institute) (7)
- Conducting independent or self-guided research on a topic of interest (even if informal or not for school) (8)
- None of the above – this is my first research experience (9)
- Other (please specify): (10) __________________________________________________

End of Block: Background prior to joining FERBS

Start of Block: Academic Experience with STEM

Q41 **Academic Experience with STEM**

Q4 Are you pre-med/vet/dental?

- No (1)
- Yes (2)

Q5 List any STEM classes you took in Spring, and rate each one as "E" for Easy, "M" for Moderately Challenging, or "D" for Difficult. If you didn’t take any additional STEM classes, write N/A.

________________________________________________________________

________________________________________________________________

________________________________________________________________

________________________________________________________________

________________________________________________________________

Q6 Did you access any academic support services for your STEM courses?

- No (1)
- Yes → Please specify what support you accessed and whether it was helpful (2) __________________________________________________

Q7 How do you think the FERBS program (peers, mentors, workshops, research etc.) helped you navigate your STEM classes this year?

________________________________________________________________

________________________________________________________________

________________________________________________________________

________________________________________________________________

________________________________________________________________

Q8 Did you drop any STEM classes this Spring semester?

- No (1)
- Yes, please briefly explain why (2) __________________________________________________

End of Block: Academic Experience with STEM

Start of Block: Research Experience

Q40 **Research Experience**

Q9 How comfortable do you currently feel with designing and conducting research?

- Extremely uncomfortable (1)
- Somewhat uncomfortable (2)
- Neither comfortable nor uncomfortable (3)
- Somewhat comfortable (4)
- Extremely comfortable (5)

Q10 How interested or enthusiastic are you about research now?

- Not interested (1)
- Slightly interested (2)
- Moderately interested (3)
- Very interested (4)
- Extremely interested (5)

Q11 How comfortable do you currently feel

|  | Extremely uncomfortable (12) | Somewhat uncomfortable (13) | Neutral (14) | Somewhat comfortable (15) | Extremely comfortable (16) |
| --- | --- | --- | --- | --- | --- |
| Communicating scientific ideas to technical audiences (1) |  |  |  |  |  |
| Communicating scientific ideas to non-technical experts (2) |  |  |  |  |  |

Q12 Please indicate how your experience in FERBS has changed the following areas for you, compared to when you first joined.

|  | Significantly decreased (1) | Slightly decreased (2) | No change (3) | Slightly increased (4) | Significantly increased (5) |
| --- | --- | --- | --- | --- | --- |
| Your comfort with designing and conducting research (1) |  |  |  |  |  |
| Your interest and enthusiasm for research (2) |  |  |  |  |  |
| Your comfort communicating scientific ideas to scientific/technical audiences (3) |  |  |  |  |  |
| Your comfort communicating scientific ideas to non-scientific audiences (4) |  |  |  |  |  |

Q13 What specific experiences contributed towards your research and communication skills?

________________________________________________________________

________________________________________________________________

________________________________________________________________

________________________________________________________________

________________________________________________________________

End of Block: Research Experience

Start of Block: Community Partnership & Growth

Q42 **Community Partnership & Growth**

Q14 To what extent do you now see scientific research as a tool for addressing real-world or community-based problems?

- Not at all (1)
- A little (2)
- Somewhat (3)
- Quite a bit (4)
- Very much so (5)

Q16 Has your first year community partnership project helped you identify any gaps between scientific research and the needs of the community? If so, in what ways?

________________________________________________________________

________________________________________________________________

________________________________________________________________

________________________________________________________________

________________________________________________________________

Q17 Which of the following communication skills have you practiced or strengthened through your community-engaged work, during your first year in FERBS? (Check all that apply)

- Explaining research clearly to non-scientists (1)
- Listening to diverse perspectives (2)
- Adapting scientific language for different audiences (3)
- Using examples or analogies to communicate concepts (4)
- Communicating across cultures or backgrounds (5)

Q18 How did collaborating with community partners differ from working with lab mentors or peers? What did you learn from this?

________________________________________________________________

________________________________________________________________

________________________________________________________________

________________________________________________________________

________________________________________________________________

Q19 Did your experience with the community project influence your academic or research interests?

- Yes, it helped clarify my goals (1)
- Yes, it changed or expanded my interests (2)
- No, but it reinforced my existing interests (3)
- No, it did not influence my goals (4)
- I’m not sure (5)

Q20 Was there a moment during the project that challenged your assumptions or shifted your perspective? What did you learn from it?

________________________________________________________________

________________________________________________________________

________________________________________________________________

________________________________________________________________

________________________________________________________________

Q21 What would you say to another student about the value of community partnership in STEM education?

________________________________________________________________

________________________________________________________________

________________________________________________________________

________________________________________________________________

________________________________________________________________

End of Block: Community Partnership & Growth

Start of Block: Skill Development

Q43 **Skill Development**

Q22 Which of the following skills did you develop or strengthen during your FERBS research experience? (Check all that apply)

Q23 Core Research & Technical Skills

- Designing experiments or research protocols (1)
- Conducting lab techniques (e.g., PCR, microscopy, cloning) (2)
- Using data analysis tools (e.g., R, Python, MATLAB, Excel) (3)
- Analyzing genomic/proteomic or other large-scale datasets (4)
- Literature review and hypothesis development (5)
- Keeping a lab or research notebook (6)
- Troubleshooting experiments or code (7)
- Managing research data (organizing, documenting, backing up) (8)

Q24 Scientific Communication Skills

- Preparing scientific figures or posters (1)
- Writing up research findings (e.g., abstracts, papers) (2)
- Presenting research orally to a scientific audience (3)
- Explaining scientific concepts to non-scientists (4)
- Adapting communication style based on audience (5)

Q25 Interpersonal & Leadership Skills

- Collaborating effectively with others in a research setting (1)
- Mentoring or guiding other students in lab or FERBS (2)
- Leading or co-leading a research-related task or project (3)
- Navigating challenges or setbacks in research (4)

Q26 Societal Relevance & Reflection

- Connecting your research to community or societal issues (1)
- Reflecting on the purpose and impact of your research (2)
- Thinking critically about equity and representation in science (3)

End of Block: Skill Development

Start of Block: Mentors

Q44 **Mentors**

Q27 Please rate your level of academic and social support from the following

|  | No support (1) | Minimal support (2) | Moderate support (3) | Strong support (4) | Very strong support (5) |
| --- | --- | --- | --- | --- | --- |
| FERBS Cohort (1) |  |  |  |  |  |
| FERBS Peer Mentors (2) |  |  |  |  |  |
| FERBS Lab Mentors (3) |  |  |  |  |  |
| FERBS leadership team (4) |  |  |  |  |  |
| Penn STEM Faculty (5) |  |  |  |  |  |
| Penn Non-STEM Faculty (6) |  |  |  |  |  |
| Academic Advisor (7) |  |  |  |  |  |

End of Block: Mentors

Start of Block: Learning Experience Reflection

Q47 **Learning Experience Reflection** This year, you took on a leadership role as part of your involvement in FERBS. Please reflect on how this experience influenced your growth.

Q48 To what extent do you agree with the following statements?

|  | Strongly Disagree (1) | Disagree (2) | Neutral (3) | Agree (4) | Strongly Agree (5) |
| --- | --- | --- | --- | --- | --- |
| I feel more confident in managing people or leading an initiative. (1) |  |  |  |  |  |
| It created new opportunities for me to take on leadership roles outside FERBS. (2) |  |  |  |  |  |
| It helped me become better at communicating ideas to people outside technical or research spaces. (3) |  |  |  |  |  |

Q49 What’s one thing you learned about yourself as a leader through this experience?

________________________________________________________________

________________________________________________________________

________________________________________________________________

________________________________________________________________

________________________________________________________________

End of Block: Learning Experience Reflection

Start of Block: Wellness

Q45 **Wellness**

Q28 During your time at Penn, have there been moments when you needed emotional or mental health support?

- No (1)
- Yes (2)

Display this question:

If During your time at Penn, have there been moments when you needed emotional or mental health supp... = Yes

Q30 Did you seek support during those times?

- Yes, I accessed support services (1)
- No, I did not seek support (2)
- I considered it, but wasn’t able to access support (3)

Display this question:

If Did you seek support during those times? = Yes, I accessed support services

Q29 If you accessed support, can you please rate the resources you accessed at Penn or outside the university?

|  | Not helpful (7) | Slightly helpful (8) | Moderately helpful (9) | Very helpful (10) | Extremely helpful (11) | Not Applicable (12) |
| --- | --- | --- | --- | --- | --- | --- |
| CAPS (Counseling and Psychological Services) (1) |  |  |  |  |  |  |
| Peer support networks (FERBS cohort, friends) (2) |  |  |  |  |  |  |
| FERBS team (3) |  |  |  |  |  |  |
| Academic advisors or mentors (4) |  |  |  |  |  |  |
| Religious/spiritual support (5) |  |  |  |  |  |  |

Display this question:

If Did you seek support during those times? = Yes, I accessed support services

Q31 Please mention any other resources you have accessed if not included above

________________________________________________________________

________________________________________________________________

________________________________________________________________

________________________________________________________________

________________________________________________________________

Q32 What aspects of FERBS have contributed most to your sense of safety, support, or sense of belonging?

________________________________________________________________

________________________________________________________________

________________________________________________________________

________________________________________________________________

________________________________________________________________

Q33 How well have you been able to manage academic stress this year?

- Not well at all (1)
- Slightly well (2)
- Somewhat well (3)
- Quite well (4)
- Extremely well (5)

Q34 What strategies or FERBS-related activities have helped you manage stress or stay grounded during difficult times?

________________________________________________________________

________________________________________________________________

________________________________________________________________

________________________________________________________________

________________________________________________________________

Q35 Do you feel that FERBS fosters a culture of care and well-being among its fellows? Why or why not?

________________________________________________________________

________________________________________________________________

________________________________________________________________

________________________________________________________________

________________________________________________________________

End of Block: Wellness

Start of Block: Reflection and Feedback

Q46 **Reflection and Feedback**

Q50 Please rate the impact of each FERBS component on your development as a researcher

|  | No impact (1) | Slight impact (2) | Moderate impact (3) | Significant impact (4) | Very significant impact (5) |
| --- | --- | --- | --- | --- | --- |
| Working in research labs (1) |  |  |  |  |  |
| Mentorship from researchers (2) |  |  |  |  |  |
| Peer relationships (3) |  |  |  |  |  |
| Workshops (4) |  |  |  |  |  |
| Visiting panels of speakers (5) |  |  |  |  |  |
| Industry talks (6) |  |  |  |  |  |
| Career services (7) |  |  |  |  |  |
| Community Partnership Project (8) |  |  |  |  |  |

Q36 Please check all the FERBS activities that had a meaningful impact on your sense of belonging in STEM, interest in research, career goals, or overall skill development.

- How to Read a Scientific Paper (58)
- Data Analysis and Responsible Conduct of Research (59)
- Communication workshop with Maiken Scott, host of WHYY’s show "The Pulse" (60)
- Elevator Pitch (61)
- Majoring in Biology and the Biological Sciences (Meet the Undergraduate Chairs) (62)
- Seeing yourself in Science (Introduction to Scientific Career Opportunities with Scientists in diverse STEM jobs and FERBS alumni panels) (63)
- Community Partnership Project Introduction & Partner Interaction (64)
- How to Create a Research Poster, including Bio Render Workshop (65)
- How to Present a Research Poster (66)
- How to Give a Clear Oral Research Presentation (67)
- Visit with Dr. Ala Stanford (68)
- Research Paper Discussions (Journal Club) (69)
- Leadership workshop with Jean-Marie Kouassi (70)
- Summer Internship Opportunities (71)
- Intro to Pharma/Biotech Internships with Merck (72)
- Mental Health Wellness with Mike (73)
- Failure Symposium Panel (74)
- Scientific Creativity – how creativity and different ways of thinking are important in research (75)
- CV Workshop (76)
- Networking workshop with Merck scientists at symposium (77)
- How to Brand Yourself in STEM with Camille Smith (78)

Q37 If you’d like, please share which of the activities you checked above were especially meaningful and why.

________________________________________________________________

________________________________________________________________

________________________________________________________________

________________________________________________________________

________________________________________________________________

Q38 Do you have any other reflections, feedback, or suggestions about your experience with the FERBS program or its activities this year?

________________________________________________________________

________________________________________________________________

________________________________________________________________

________________________________________________________________

________________________________________________________________

End of Block: Reflection and Feedback

Survey (Class of 2026)

Survey Flow

Block: Background prior to joining FERBS (4 Questions)

Standard: Academic Experience with STEM (6 Questions)

Standard: Research Experience (6 Questions)

Standard: Community Partnership & Growth (8 Questions)

Standard: Skill Development (6 Questions)

Standard: Mentors (2 Questions)

Standard: Leadership Experience Reflection (4 Questions)

Standard: Peer Mentorship Experience (4 Questions)

Standard: Wellness (9 Questions)

Standard: Reflection and Feedback (5 Questions)

| Page Break |  |
| --- | --- |

Start of Block: Background prior to joining FERBS

Q39 **Background prior to joining FERBS**

Q1  What type of high school did you attend?

- Public (1)
- Charter (2)
- Private (with full scholarship) (3)
- Private (full or partial pay) (4)
- Homeschool (5)
- Other: (6) __________________________________________________

Q2 Which of the following were available at your high school? (Check all that apply)

- Advanced Placement (AP) or International Baccalaureate (IB) courses (1)
- Honors-level STEM courses (2)
- Dedicated well-staffed college counseling office (3)
- Science lab facilities (4)
- Extracurricular STEM clubs or competitions (e.g., robotics, science fair) (5)
- Tutoring or academic support services (6)
- Dual-enrollment or college-credit opportunities (7)
- None of the above (8)

Q3 Before joining this program, which of the following best describes your experience with research? (Check all that apply)

- Reading or discussing research studies in a science class (1)
- Visiting a university, research lab, or science center for a tour, workshop, or outreach event (2)
- Conducting small experiments or demonstrations during class (3)
- Completing a STEM research project for a class (e.g., biology, environmental science, engineering) (4)
- Conducting and presenting a science fair project (5)
- Participating in a structured research program during the academic year with a mentor (outside of school) (6)
- Participating in a summer research or inquiry-based program (e.g., at a university, lab, or research institute) (7)
- Conducting independent or self-guided research on a topic of interest (even if informal or not for school) (8)
- None of the above – this is my first research experience (9)
- Other (please specify): (10) __________________________________________________

End of Block: Background prior to joining FERBS

Start of Block: Academic Experience with STEM

Q41 **Academic Experience with STEM**

Q4 Are you pre-med/vet/dental?

- No (1)
- Yes (2)

Q5 List any STEM classes you took in the Spring, and rate each one as "E" for Easy, "M" for Moderately Challenging, or "D" for Difficult. If you didn’t take any additional STEM classes, write N/A.

________________________________________________________________

________________________________________________________________

________________________________________________________________

________________________________________________________________

________________________________________________________________

Q6 Did you access any academic support services for your STEM courses?

- No (1)
- Yes → Please specify what support you accessed and whether it was helpful (2) __________________________________________________

Q7 How do you think the FERBS program (peers, mentors, workshops, research etc.) helped you navigate your STEM classes this year?

________________________________________________________________

________________________________________________________________

________________________________________________________________

________________________________________________________________

________________________________________________________________

Q8 Did you drop any STEM classes this Spring semester?

- No (1)
- Yes, please briefly explain why (2) __________________________________________________

End of Block: Academic Experience with STEM

Start of Block: Research Experience

Q40 **Research Experience**

Q9 How comfortable do you currently feel with designing and conducting research?

- Extremely uncomfortable (1)
- Somewhat uncomfortable (2)
- Neither comfortable nor uncomfortable (3)
- Somewhat comfortable (4)
- Extremely comfortable (5)

Q10 How interested or enthusiastic are you about research now?

- Not interested (1)
- Slightly interested (2)
- Moderately interested (3)
- Very interested (4)
- Extremely interested (5)

Q11 How comfortable do you currently feel

|  | Extremely uncomfortable (12) | Somewhat uncomfortable (13) | Neutral (14) | Somewhat comfortable (15) | Extremely comfortable (16) |
| --- | --- | --- | --- | --- | --- |
| Communicating scientific ideas to technical audiences (1) |  |  |  |  |  |
| Communicating scientific ideas to non-technical experts (2) |  |  |  |  |  |

Q12 Please indicate how your experience in FERBS has changed the following areas for you, compared to when you first joined.

|  | Significantly decreased (1) | Slightly decreased (2) | No change (3) | Slightly increased (4) | Significantly increased (5) |
| --- | --- | --- | --- | --- | --- |
| Your comfort with designing and conducting research (1) |  |  |  |  |  |
| Your interest and enthusiasm for research (2) |  |  |  |  |  |
| Your comfort communicating scientific ideas to scientific/technical audiences (3) |  |  |  |  |  |
| Your comfort communicating scientific ideas to non-scientific audiences (4) |  |  |  |  |  |

Q13 What specific experiences contributed towards your research and communication skills?

________________________________________________________________

________________________________________________________________

________________________________________________________________

________________________________________________________________

________________________________________________________________

End of Block: Research Experience

Start of Block: Community Partnership & Growth

Q42 **Community Partnership & Growth**

Q14 To what extent do you now see scientific research as a tool for addressing real-world or community-based problems?

- Not at all (1)
- A little (2)
- Somewhat (3)
- Quite a bit (4)
- Very much so (5)

Q16 Has your first year community partnership project helped you identify any gaps between scientific research and the needs of the community? If so, in what ways?

________________________________________________________________

________________________________________________________________

________________________________________________________________

________________________________________________________________

________________________________________________________________

Q17 Which of the following communication skills have you practiced or strengthened through your community-engaged work, during your first year in FERBS? (Check all that apply)

- Explaining research clearly to non-scientists (1)
- Listening to diverse perspectives (2)
- Adapting scientific language for different audiences (3)
- Using examples or analogies to communicate concepts (4)
- Communicating across cultures or backgrounds (5)

Q18 How did collaborating with community partners differ from working with lab mentors or peers? What did you learn from this?

________________________________________________________________

________________________________________________________________

________________________________________________________________

________________________________________________________________

________________________________________________________________

Q19 Did your experience with the community project influence your academic or research interests?

- Yes, it helped clarify my goals (1)
- Yes, it changed or expanded my interests (2)
- No, but it reinforced my existing interests (3)
- No, it did not influence my goals (4)
- I’m not sure (5)

Q20 Was there a moment during the project that challenged your assumptions or shifted your perspective? What did you learn from it?

________________________________________________________________

________________________________________________________________

________________________________________________________________

________________________________________________________________

________________________________________________________________

Q21 What would you say to another student about the value of community partnership in STEM education?

________________________________________________________________

________________________________________________________________

________________________________________________________________

________________________________________________________________

________________________________________________________________

End of Block: Community Partnership & Growth

Start of Block: Skill Development

Q43 **Skill Development**

Q22 Which of the following skills did you develop or strengthen during your FERBS research experience? (Check all that apply)

Q23 Core Research & Technical Skills

- Designing experiments or research protocols (1)
- Conducting lab techniques (e.g., PCR, microscopy, cloning) (2)
- Using data analysis tools (e.g., R, Python, MATLAB, Excel) (3)
- Analyzing genomic/proteomic or other large-scale datasets (4)
- Literature review and hypothesis development (5)
- Keeping a lab or research notebook (6)
- Troubleshooting experiments or code (7)
- Managing research data (organizing, documenting, backing up) (8)

Q24 Scientific Communication Skills

- Preparing scientific figures or posters (1)
- Writing up research findings (e.g., abstracts, papers) (2)
- Presenting research orally to a scientific audience (3)
- Explaining scientific concepts to non-scientists (4)
- Adapting communication style based on audience (5)

Q25 Interpersonal & Leadership Skills

- Collaborating effectively with others in a research setting (1)
- Mentoring or guiding other students in lab or FERBS (2)
- Leading or co-leading a research-related task or project (3)
- Navigating challenges or setbacks in research (4)

Q26 Societal Relevance & Reflection

- Connecting your research to community or societal issues (1)
- Reflecting on the purpose and impact of your research (2)
- Thinking critically about equity and representation in science (3)

End of Block: Skill Development

Start of Block: Mentors

Q44 **Mentors**

Q27 Please rate your level of academic and social support from the following

|  | No support (1) | Minimal support (2) | Moderate support (3) | Strong support (4) | Very strong support (5) |
| --- | --- | --- | --- | --- | --- |
| FERBS Cohort (1) |  |  |  |  |  |
| FERBS Peer Mentors (2) |  |  |  |  |  |
| FERBS Lab Mentors (3) |  |  |  |  |  |
| FERBS leadership team (4) |  |  |  |  |  |
| Penn STEM Faculty (5) |  |  |  |  |  |
| Penn Non-STEM Faculty (6) |  |  |  |  |  |
| Academic Advisor (7) |  |  |  |  |  |

End of Block: Mentors

Start of Block: Leadership Experience Reflection

Q47 **Leadership Experience Reflection** During your second year in FERBS, you took on a leadership role as part of your involvement in FERBS. Please reflect on how this experience influenced your growth.

Q48 To what extent do you agree with the following statements?

|  | Strongly Disagree (1) | Disagree (2) | Neutral (3) | Agree (4) | Strongly Agree (5) |
| --- | --- | --- | --- | --- | --- |
| The leadership experience helped me feel more confident in managing people or leading an initiative. (1) |  |  |  |  |  |
| It created new opportunities for me to take on leadership roles outside FERBS. (2) |  |  |  |  |  |
| It helped me become better at communicating ideas to people outside technical or research spaces. (3) |  |  |  |  |  |

Q49 What’s one thing you learned about yourself as a leader through this experience?

________________________________________________________________

________________________________________________________________

________________________________________________________________

________________________________________________________________

________________________________________________________________

Q52 Have you continued your leadership activity from sophomore year?

- Yes (1)
- No (2)

End of Block: Leadership Experience Reflection

Start of Block: Peer Mentorship Experience

Q53 **Peer Mentorship Experience**

Q54 How prepared did you feel to be a peer mentor to students in the Class of 2028

- Not at all prepared (1)
- Slightly prepared (2)
- Moderately prepared (3)
- Very prepared (4)
- Exceptionally prepared (5)

Q55 To what extent do you agree with the statement: "Being a peer mentor helped me better understand how to support others in navigating STEM and research environments."

- Strongly disagree (1)
- Somewhat disagree (2)
- Neither agree nor disagree (3)
- Somewhat agree (4)
- Strongly agree (5)

Q56 What gaps or challenges did you face as a peer mentor and/or peer mentee?

________________________________________________________________

________________________________________________________________

________________________________________________________________

________________________________________________________________

________________________________________________________________

End of Block: Peer Mentorship Experience

Start of Block: Wellness

Q45 **Wellness**

Q28 During your time at Penn, have there been moments when you needed emotional or mental health support?

- No (1)
- Yes (2)

Display this question:

If During your time at Penn, have there been moments when you needed emotional or mental health supp... = Yes

Q30 Did you seek support during those times?

- Yes, I accessed support services (1)
- No, I did not seek support (2)
- I considered it, but wasn’t able to access support (3)

Display this question:

If Did you seek support during those times? = Yes, I accessed support services

Q29 If you accessed support, can you please rate the resources you accessed at Penn or outside the university?

|  | Not helpful (7) | Slightly helpful (8) | Moderately helpful (9) | Very helpful (10) | Extremely helpful (11) | Not Applicable (12) |
| --- | --- | --- | --- | --- | --- | --- |
| CAPS (Counseling and Psychological Services) (1) |  |  |  |  |  |  |
| Peer support networks (FERBS cohort, friends) (2) |  |  |  |  |  |  |
| FERBS team (3) |  |  |  |  |  |  |
| Academic advisors or mentors (4) |  |  |  |  |  |  |
| Religious/spiritual support (5) |  |  |  |  |  |  |

Display this question:

If Did you seek support during those times? = Yes, I accessed support services

Q31 Please mention any other resources you have accessed if not included above

________________________________________________________________

________________________________________________________________

________________________________________________________________

________________________________________________________________

________________________________________________________________

Q32 What aspects of FERBS have contributed most to your sense of safety, support, or sense of belonging?

________________________________________________________________

________________________________________________________________

________________________________________________________________

________________________________________________________________

________________________________________________________________

Q33 How well have you been able to manage academic stress this year?

- Not well at all (1)
- Slightly well (2)
- Somewhat well (3)
- Quite well (4)
- Extremely well (5)

Q34 What strategies or FERBS-related activities have helped you manage stress or stay grounded during difficult times?

________________________________________________________________

________________________________________________________________

________________________________________________________________

________________________________________________________________

________________________________________________________________

Q35 Do you feel that FERBS fosters a culture of care and well-being among its fellows? Why or why not?

________________________________________________________________

________________________________________________________________

________________________________________________________________

________________________________________________________________

________________________________________________________________

End of Block: Wellness

Start of Block: Reflection and Feedback

Q46 **Reflection and Feedback**

Q50 Please rate the impact of each FERBS component on your development as a researcher

|  | No impact (1) | Slight impact (2) | Moderate impact (3) | Significant impact (4) | Very significant impact (5) |
| --- | --- | --- | --- | --- | --- |
| Working in research labs (1) |  |  |  |  |  |
| Mentorship from researchers (2) |  |  |  |  |  |
| Peer relationships (3) |  |  |  |  |  |
| Workshops (4) |  |  |  |  |  |
| Visiting panels of speakers (5) |  |  |  |  |  |
| Industry talks (6) |  |  |  |  |  |
| Career services (7) |  |  |  |  |  |
| Community Partnership Project (8) |  |  |  |  |  |

Q36 Please check all the FERBS activities that had a meaningful impact on your sense of belonging in STEM, interest in research, career goals, or overall skill development.

- How to Read a Scientific Paper (88)
- Elevator Pitch (89)
- How to Create and present a Research Poster (90)
- How to Give a Clear Oral Research Presentation (91)
- Scientific Career Opportunities (panels) (92)
- Community Partnership Project Introduction & Partner Interaction (93)
- Seeing yourself in Science (Introduction to Scientific Career Opportunities with Scientists in diverse STEM jobs and FERBS alumni panels) (94)
- Majoring in Biology and the Biological Sciences (Meet the Undergraduate Chairs) (95)
- Journal Club (96)
- Leadership workshop with Jean-Marie Kouassi (97)
- CV Workshop (98)
- Networking workshop with Merck scientists (99)
- Visit with Dr. Ala Stanford (100)
- Visit with Nobel Laureate Katalin Kariko (101)
- MD/PhD Coordinator Visit (102)
- Mental Health Wellness with Mike (103)
- “One Slide meeting” – students shared one slide discussing annual goals or research updates (104)
- Personal Statement workshop (105)
- Summer Internship Opportunities (106)
- Intro to Pharma/Biotech Internships-How to Interview with Merck (107)
- Networking workshop with Merck scientists at symposium (108)
- Peer Mentoring Workshop (109)
- Navigating conferences/ABRCMS (110)
- How to Brand Yourself in STEM with Camille Smith (111)

Q37 If you’d like, please share which of the activities you checked above were especially meaningful and why.

________________________________________________________________

________________________________________________________________

________________________________________________________________

________________________________________________________________

________________________________________________________________

Q38 Do you have any other reflections, feedback, or suggestions about your experience with the FERBS program or its activities this year?

________________________________________________________________

________________________________________________________________

________________________________________________________________

________________________________________________________________

________________________________________________________________

End of Block: Reflection and Feedback

Survey (Classes of 2025 and 2024)

Survey Flow

Block: Background prior to joining FERBS (4 Questions)

Standard: Academic Experience with STEM (5 Questions)

Standard: Research Experience (6 Questions)

Standard: Community Partnership & Growth (8 Questions)

Standard: Skill Development (6 Questions)

Standard: Mentors (2 Questions)

Standard: Leadership Experience Reflection (4 Questions)

Standard: Peer Mentorship Experience (4 Questions)

Standard: Wellness (9 Questions)

Standard: Reflection and Feedback (7 Questions)

| Page Break |  |
| --- | --- |

Start of Block: Background prior to joining FERBS

Q39 **Background prior to joining FERBS**

Q1  What type of high school did you attend?

- Public (1)
- Charter (2)
- Private (with full scholarship) (3)
- Private (full or partial pay) (4)
- Homeschool (5)
- Other: (6) __________________________________________________

Q2 Which of the following were available at your high school? (Check all that apply)

- Advanced Placement (AP) or International Baccalaureate (IB) courses (1)
- Honors-level STEM courses (2)
- Dedicated well-staffed college counseling office (3)
- Science lab facilities (4)
- Extracurricular STEM clubs or competitions (e.g., robotics, science fair) (5)
- Tutoring or academic support services (6)
- Dual-enrollment or college-credit opportunities (7)
- None of the above (8)

Q3 Before joining this program, which of the following best describes your experience with research? (Check all that apply)

- Reading or discussing research studies in a science class (1)
- Visiting a university, research lab, or science center for a tour, workshop, or outreach event (2)
- Conducting small experiments or demonstrations during class (3)
- Completing a STEM research project for a class (e.g., biology, environmental science, engineering) (4)
- Conducting and presenting a science fair project (5)
- Participating in a structured research program during the academic year with a mentor (outside of school) (6)
- Participating in a summer research or inquiry-based program (e.g., at a university, lab, or research institute) (7)
- Conducting independent or self-guided research on a topic of interest (even if informal or not for school) (8)
- None of the above – this is my first research experience (9)
- Other (please specify): (10) __________________________________________________

End of Block: Background prior to joining FERBS

Start of Block: Academic Experience with STEM

Q41 **Academic Experience with STEM**

Q4 Were you pre-med/vet/dental during your time in FERBS?

- No (1)
- Yes (2)

Q6 Did you access any academic support services for your STEM courses?

- No (1)
- Yes → Please specify what support you accessed and whether it was helpful (2) __________________________________________________

Q7 How do you think the FERBS program (peers, mentors, workshops, research etc.) helped you navigate your STEM classes this year?

________________________________________________________________

________________________________________________________________

________________________________________________________________

________________________________________________________________

________________________________________________________________

Q8 Did you drop any STEM classes this Spring semester?

- No (1)
- Yes, please briefly explain why (2) __________________________________________________

End of Block: Academic Experience with STEM

Start of Block: Research Experience

Q40 **Research Experience**

Q9 How comfortable do you currently feel with designing and conducting research?

- Extremely uncomfortable (1)
- Somewhat uncomfortable (2)
- Neither comfortable nor uncomfortable (3)
- Somewhat comfortable (4)
- Extremely comfortable (5)

Q10 How interested or enthusiastic are you about research now?

- Not interested (1)
- Slightly interested (2)
- Moderately interested (3)
- Very interested (4)
- Extremely interested (5)

Q11 How comfortable do you currently feel

|  | Extremely uncomfortable (12) | Somewhat uncomfortable (13) | Neutral (14) | Somewhat comfortable (15) | Extremely comfortable (16) |
| --- | --- | --- | --- | --- | --- |
| Communicating scientific ideas to technical audiences (1) |  |  |  |  |  |
| Communicating scientific ideas to non-technical experts (2) |  |  |  |  |  |

Q12 Please indicate how your experience in FERBS has changed the following areas for you, compared to when you first joined.

|  | Significantly decreased (1) | Slightly decreased (2) | No change (3) | Slightly increased (4) | Significantly increased (5) |
| --- | --- | --- | --- | --- | --- |
| Your comfort with designing and conducting research (1) |  |  |  |  |  |
| Your interest and enthusiasm for research (2) |  |  |  |  |  |
| Your comfort communicating scientific ideas to scientific/technical audiences (3) |  |  |  |  |  |
| Your comfort communicating scientific ideas to non-scientific audiences (4) |  |  |  |  |  |

Q13 What specific experiences contributed towards your research and communication skills?

________________________________________________________________

________________________________________________________________

________________________________________________________________

________________________________________________________________

________________________________________________________________

End of Block: Research Experience

Start of Block: Community Partnership & Growth

Q42 **Community Partnership & Growth**

Q14 To what extent do you now see scientific research as a tool for addressing real-world or community-based problems?

- Not at all (1)
- A little (2)
- Somewhat (3)
- Quite a bit (4)
- Very much so (5)

Q16 Has your community partnership project, from your first year in FERBS, helped you identify any gaps between scientific research and the needs of the community? If so, in what ways?

________________________________________________________________

________________________________________________________________

________________________________________________________________

________________________________________________________________

________________________________________________________________

Q17 Which of the following communication skills have you practiced or strengthened through your community-engaged work, from your first year in FERBS? (Check all that apply)

- Explaining research clearly to non-scientists (1)
- Listening to diverse perspectives (2)
- Adapting scientific language for different audiences (3)
- Using examples or analogies to communicate concepts (4)
- Communicating across cultures or backgrounds (5)

Q18 How did collaborating with community partners differ from working with lab mentors or peers? What did you learn from this?

________________________________________________________________

________________________________________________________________

________________________________________________________________

________________________________________________________________

________________________________________________________________

Q19 Did your experience with the community project influence your academic or research interests?

- Yes, it helped clarify my goals (1)
- Yes, it changed or expanded my interests (2)
- No, but it reinforced my existing interests (3)
- No, it did not influence my goals (4)
- I’m not sure (5)

Q20 Was there a moment during the project that challenged your assumptions or shifted your perspective? What did you learn from it?

________________________________________________________________

________________________________________________________________

________________________________________________________________

________________________________________________________________

________________________________________________________________

Q21 What would you say to another student about the value of community partnership in STEM education?

________________________________________________________________

________________________________________________________________

________________________________________________________________

________________________________________________________________

________________________________________________________________

End of Block: Community Partnership & Growth

Start of Block: Skill Development

Q43 **Skill Development**

Q22 Which of the following skills did you develop or strengthen during your FERBS research experience? (Check all that apply)

Q23 Core Research & Technical Skills

- Designing experiments or research protocols (1)
- Conducting lab techniques (e.g., PCR, microscopy, cloning) (2)
- Using data analysis tools (e.g., R, Python, MATLAB, Excel) (3)
- Analyzing genomic/proteomic or other large-scale datasets (4)
- Literature review and hypothesis development (5)
- Keeping a lab or research notebook (6)
- Troubleshooting experiments or code (7)
- Managing research data (organizing, documenting, backing up) (8)

Q24 Scientific Communication Skills

- Preparing scientific figures or posters (1)
- Writing up research findings (e.g., abstracts, papers) (2)
- Presenting research orally to a scientific audience (3)
- Explaining scientific concepts to non-scientists (4)
- Adapting communication style based on audience (5)

Q25 Interpersonal & Leadership Skills

- Collaborating effectively with others in a research setting (1)
- Mentoring or guiding other students in lab or FERBS (2)
- Leading or co-leading a research-related task or project (3)
- Navigating challenges or setbacks in research (4)

Q26 Societal Relevance & Reflection

- Connecting your research to community or societal issues (1)
- Reflecting on the purpose and impact of your research (2)
- Thinking critically about equity and representation in science (3)

End of Block: Skill Development

Start of Block: Mentors

Q44 **Mentors**

Q27 Please rate your level of academic and social support from the following

|  | No support (1) | Minimal support (2) | Moderate support (3) | Strong support (4) | Very strong support (5) |
| --- | --- | --- | --- | --- | --- |
| FERBS Cohort (1) |  |  |  |  |  |
| FERBS Peer Mentors (2) |  |  |  |  |  |
| FERBS Lab Mentors (3) |  |  |  |  |  |
| FERBS leadership team (4) |  |  |  |  |  |
| Penn STEM Faculty (5) |  |  |  |  |  |
| Penn Non-STEM Faculty (6) |  |  |  |  |  |
| Academic Advisor (7) |  |  |  |  |  |

End of Block: Mentors

Start of Block: Leadership Experience Reflection

Q47 **Leadership Experience Reflection** During your second year in FERBS, you took on a leadership role as part of your involvement in FERBS. Please reflect on how this experience influenced your growth.

Q48 To what extent do you agree with the following statements?

|  | Strongly Disagree (1) | Disagree (2) | Neutral (3) | Agree (4) | Strongly Agree (5) |
| --- | --- | --- | --- | --- | --- |
| The leadership experience helped me feel more confident in managing people or leading an initiative. (1) |  |  |  |  |  |
| It created new opportunities for me to take on leadership roles outside FERBS. (2) |  |  |  |  |  |
| It helped me become better at communicating ideas to people outside technical or research spaces. (3) |  |  |  |  |  |

Q49 What’s one thing you learned about yourself as a leader through this experience?

________________________________________________________________

________________________________________________________________

________________________________________________________________

________________________________________________________________

________________________________________________________________

Q52 Have you continued your leadership activity from sophomore year?

- Yes (1)
- No (2)

End of Block: Leadership Experience Reflection

Start of Block: Peer Mentorship Experience

Q53 **Peer Mentorship Experience**

Q54 How prepared did you feel to be a peer mentor to students in the Class of 2027?

- Not at all prepared (1)
- Slightly prepared (2)
- Moderately prepared (3)
- Very prepared (4)
- Exceptionally prepared (5)

Q55 To what extent do you agree with the statement: "Being a peer mentor helped me better understand how to support others in navigating STEM and research environments."

- Strongly disagree (1)
- Somewhat disagree (2)
- Neither agree nor disagree (3)
- Somewhat agree (4)
- Strongly agree (5)

Q56 What gaps or challenges did you face as a peer mentor and/or peer mentee?

________________________________________________________________

________________________________________________________________

________________________________________________________________

________________________________________________________________

________________________________________________________________

End of Block: Peer Mentorship Experience

Start of Block: Wellness

Q45 **Wellness**

Q28 During your time at Penn, were there moments when you needed emotional or mental health support?

- No (1)
- Yes (2)

Display this question:

If During your time at Penn, were there moments when you needed emotional or mental health support? = Yes

Q30 Did you seek support during those times?

- Yes, I accessed support services (1)
- No, I did not seek support (2)
- I considered it, but wasn’t able to access support (3)

Display this question:

If Did you seek support during those times? = Yes, I accessed support services

Q29 If you accessed support, can you please rate the resources you accessed at Penn or outside the university?

|  | Not helpful (7) | Slightly helpful (8) | Moderately helpful (9) | Very helpful (10) | Extremely helpful (11) | Not Applicable (12) |
| --- | --- | --- | --- | --- | --- | --- |
| CAPS (Counseling and Psychological Services) (1) |  |  |  |  |  |  |
| Peer support networks (FERBS cohort, friends) (2) |  |  |  |  |  |  |
| FERBS team (3) |  |  |  |  |  |  |
| Academic advisors or mentors (4) |  |  |  |  |  |  |
| Religious/spiritual support (5) |  |  |  |  |  |  |

Display this question:

If Did you seek support during those times? = Yes, I accessed support services

Q31 Please mention any other resources you have accessed if not included above

________________________________________________________________

________________________________________________________________

________________________________________________________________

________________________________________________________________

________________________________________________________________

Q32 What aspects of FERBS contributed most to your sense of safety, support, or sense of belonging?

________________________________________________________________

________________________________________________________________

________________________________________________________________

________________________________________________________________

________________________________________________________________

Q33 How well did you manage academic stress this year?

- Not well at all (1)
- Slightly well (2)
- Somewhat well (3)
- Quite well (4)
- Extremely well (5)

Q34 What strategies or FERBS-related activities have helped you manage stress or stay grounded during difficult times?

________________________________________________________________

________________________________________________________________

________________________________________________________________

________________________________________________________________

________________________________________________________________

Q35 Do you feel that FERBS fosters a culture of care and well-being among its fellows? Why or why not?

________________________________________________________________

________________________________________________________________

________________________________________________________________

________________________________________________________________

________________________________________________________________

End of Block: Wellness

Start of Block: Reflection and Feedback

Q46 **Reflection and Feedback**

Q50 Please rate the impact of each FERBS component on your development as a researcher

|  | No impact (1) | Slight impact (2) | Moderate impact (3) | Significant impact (4) | Very significant impact (5) |
| --- | --- | --- | --- | --- | --- |
| Working in research labs (1) |  |  |  |  |  |
| Mentorship from researchers (2) |  |  |  |  |  |
| Peer relationships (3) |  |  |  |  |  |
| Workshops (4) |  |  |  |  |  |
| Visiting panels of speakers (5) |  |  |  |  |  |
| Industry talks (6) |  |  |  |  |  |
| Career services (7) |  |  |  |  |  |
| Community Partnership Project (8) |  |  |  |  |  |

Q36 Please check all the FERBS activities that had a meaningful impact on your sense of belonging in STEM, interest in research, career goals, or overall skill development.

- How to Read a Scientific Paper (78)
- Journal Club (79)
- Elevator Pitch (80)
- How to Create and present a Research Poster (81)
- How to Give a Clear Oral Research Presentation (82)
- Summer Internship Opportunities (83)
- Community Partnership Project Introduction & Partner Interaction (84)
- Seeing yourself in Science (Introduction to Scientific Career Opportunities with Scientists in diverse STEM jobs and FERBS alumni panels) (85)
- Majoring in Biology and the Biological Sciences (Meet the Undergraduate Chairs) (86)
- Visit with Dr. Ala Stanford (87)
- Visit with Nobel Laureate Katalin Kariko (88)
- Mental Health Wellness with Mike (89)
- Handling Failure and Uncertainty (90)
- MD/PhD Coordinator Visit (91)
- Navigating conferences/ABRCMS (92)
- “One Slide meeting” – Students shared one Slide Discussing Annual Goals or Research Updates (93)
- Personal Statement Workshop (94)
- Intro to Pharma/Biotech Internships-How to Interview with Merck (95)
- Honors Thesis Writing Workshop (96)
- Post-Graduation plans/recapping time at FERBS (97)
- Post grad and gap years opportunities (98)
- The Science of Scientific Writing (99)
- Networking workshop with Merck scientists at symposium (100)

Q37 If you’d like, please share which of the activities you checked above were especially meaningful and why.

________________________________________________________________

________________________________________________________________

________________________________________________________________

________________________________________________________________

________________________________________________________________

Q57 Reflecting on your time in the program, how has FERBS shaped your academic or career goals at this stage in your journey?

________________________________________________________________

________________________________________________________________

________________________________________________________________

________________________________________________________________

________________________________________________________________

Q58 Please share how FERBS has shaped your sense of belonging in STEM over the four years you have been in it.

________________________________________________________________

________________________________________________________________

________________________________________________________________

________________________________________________________________

________________________________________________________________

Q38 Do you have any other reflections, feedback, or suggestions about your experience with the FERBS program or its activities this year?

________________________________________________________________

________________________________________________________________

________________________________________________________________

________________________________________________________________

________________________________________________________________

End of Block: Reflection and Feedback

**Supplemental Document 2**

Interview Questions

**FERBS Mixed-Methods Evaluation Interview Guide**

**Section 1: Entry Points & Expectations**

1. *What drew you to apply to FERBS, and what were you hoping to get out of it when you started?*
2. *Before FERBS, what did “research” mean to you? Did it feel like something you could see yourself doing?*
3. *How has your understanding of what it means to be a scientist changed during your time in FERBS?*

Section 2: Scientific Identity & Belonging

1. *Have there been moments when you questioned whether STEM was “for you”? How has FERBS affected those thoughts?*
2. *Was there a moment in FERBS when you felt like you truly belonged in STEM? Can you describe it?*
3. *Do you feel like you could bring your full self to your research and leadership roles in FERBS? What helped create that environment?*

Section 3: Skill-Building & Research Growth

1. *What are one or two specific skills—technical or otherwise—you developed through FERBS? Can you give an example?*
2. *What challenged you most—technically or interpersonally—during your research or CPP work? What did you learn from that experience?*
3. *Did participating in FERBS help you grow in your leadership skills? How?*
4. *How has FERBS helped you learn to communicate about science—with other scientists and with people outside the research world?*

Section 4: Community Partnership & Broader Impact

1. *How did working with the community through the CPP project influence how you think about science and your role in it?*
2. *Did working on the community project change what you think “impact” means in science?*

Section 5: Mentorship, Reflection & Growth

1. *Was there a mentor or peer who made a big difference for you? What did they do that helped?*
2. *How did your lab mentor help you*
3. *How has FERBS changed the way you see yourself—and what you believe you’re capable of doing in the future?*

- *(Follow-up: What do you think you want to do in the future, and how has FERBS shaped that?)*

1. *Looking back, what parts of FERBS made the biggest difference for you—and what, if anything, do you think could be improved?*

**Supplemental Document 1. PennFERBS Biology 1850 Syllabus Spring 2026**

**Description:**

This course offers students an understanding of the opportunities within, and practice of, research in biological sciences. The course focuses on developing students’ scientific communication and presentation, knowledge and understanding of career opportunities and experiences, and collaborative teamwork through a community partnership. The course will be taught through interactive modules, active learning style exercises, and in-person community projects focused towards developing each student as a young researcher and scientist.

**SNF Supported Course:**

This course is part of the Stavros Niarchos Foundation (SNF) Paideia Program, which creates and supports opportunities for the Penn community to learn *about* dialogue, *from*dialogue, and *how to*dialogue, towards a goal of individual and societal wellness.  SNF Paideia-designated courses cultivate the knowledge, skills, ethical frameworks, and experiences necessary to serve as engaged community members in society. Connect further with Paideia’s mission to “educate the whole person” at [*https://snfpaideia.upenn.edu*](https://snfpaideia.upenn.edu/)*.*

Isabel, Jean-Marie and I want to create a learning environment in which every student feels treated with respect such that you can contribute your ideas and questions constructively. If at any point, you feel this is not the case, please let us know via email, after class or setting up an appointment, so we can improve the classroom setting.

**Missed class assignment**: A 1 page paper discussing the missed topic.

BIOL1850 can be counted toward the Biology major as one of the electives

**Grading and Course Calculation:**

Class Participation and Attendance (20%)

Research Performance (including mentor assessment) (20%)

Community Partnerships (including peer assessments) (20%)

Research Seminar Summaries of two Research Seminars (10%)

(List of Penn Biological Sciences seminar series can be found on canvas page)

Oral Presentation of Research Project (15%)

Oral Presentation of Community Group Project (15%)

**BIOL 1850 Course Schedule,** in addition to >5h/week lab work

| **Week:** | **Date:** | **Topic:** |
| --- | --- | --- |
| **1** | **1/15** | Introduction to course/ community partnership. Seeing yourself in Science (zoom and in-person FERBS alumni panel), peer lab visit assignments |
| **2** | **1/22** | Science Communication, **Alexis Pedrick**,Science History Institute, PA |
| **3** | **1/29** | Elevator pitch/Reflection on peer lab visits |
| **4** | **2/5** | Professionalism in science/literature searches |
| **5** | **2/12** | Data analysis and responsible conduct of research/AI |
| **6** | **2/19** | Community partnership. Introduction to community partnership project “*Chemical herbicide use in Philly public parks”* (Park and Rec, Council and Community representatives) |
| **7** | **2/26** | Community Partnership (Scientific background research) |
| **8** | **3/5** | Community Partnership (pre-proposal)/**Dr.** **Tyrone Hayes**,Berkeley, CA |
|  | **3/8-16** | SPRING BREAK |
| **9** | **3/19** | How to present a clear oral presentation/Community partnership |
| **10** | **3/26** | Community partnership |
| **11** | **4/2** | Majoring in Biology and the Biological Sciences (meet undergraduate chairs and FERBS fellows from Biochemistry, Biophysics, Biology, and Neurobiology majors at Penn), also continue Community Partnership |
| **12** | **4/9** | Research presentation practice |
| **13** | **4/16** | **Final Lab Research Presentation** |
| **14** | **4/23** | No class |
| **15** | **4/18th** | **Community partnership – school visit (9am-1pm)** |
| **17** | **5/01** | **PennFERBS/Merck partnership celebration (1-6pm)** (second reading day) |
